# Supplementary material
Source: publisher site journal article supplement (https://www.dovepress.com/get_supplementary_file.php?f=298660.docx)
Supplement: Supplementary file 1 [file get_supplementary_file.php]

EVALUATION OF PHARMACEUTICALS INVENTORY MANAGEMENT IN SELECTED PUBLIC HEALTH FACILITIES OF WEST ARSI ZONE, OROMIA REGIONAL STATE, ETHIOPIA

**SUPPLEMENTARY FILE**

**Operational definitions or definitions of terminologies**

**Medicines:** In this study medicines include all RDF drugs, medical supplies and laboratory reagents in the health facilities. For the purpose of this research the word medicine is used interchangeably with drug.

**Public health facilities**: Health facilities including hospitals and health centers owned by the public health sector or government that is operated or designed to provide health care service.

**Category I:** is high priority group, requires greatest attention. It contain all the vital and costly items, whose shortage may adversely affect the functioning of the hospital or whose over stocking /pilferage may lead to financial loss to the hospital.

**Category II:** is under moderate management and moderate attention is devoted. These items are essential but are less costly and can have lesser stringent controls.

**Category III:** is under simple management and receives loose attention. Here items are desirable but would not affect the functioning of the hospital even if they are not available for a long time.

**Inventory:** is an ideal stock of physical goods that contain economic value, and are held in various forms by an organization in its custody awaiting, packing, processing, transformation, use or sale in a future point of time.

**Inventory management**: involves planning, organizing and controlling the flow of materials from their initial purchase unit through internal operations to the service point through distribution. It involves the recording and monitoring of stock level, forecasting future demand and deciding on when and how to order.

**Inventory control:** investigating the situation of inventory and finding a solution to inventory related problems such as costs of procurement, storage, handling, distribution and other charges.

**Annex I: Data collection format**

Supplementary Table 1. Data collection form for ABC analysis

| SN | List of items | Unit | Unit  price | quantity | Total  price |
| --- | --- | --- | --- | --- | --- |
|  |  |  |  |  |  |
|  |  |  |  |  |  |
|  |  |  |  |  |  |
|  |  |  |  |  |  |

Supplementary Table 2. Data collection tools for categorizing pharmaceutical used in hospitals and health centers according to VEN analysis.

| **S/ N** | **Conditions treated** | **Occurrence of target condition** | | | **Persons treated/day** | | | **Severity of Target Condition** | | | | | |
| --- | --- | --- | --- | --- | --- | --- | --- | --- | --- | --- | --- | --- | --- |
| **> 5%** | **1– 5%** | **<1%** | **>5%** | **1–5%** | **< 1%** | **Life Threatening** | | | **Disabling** | | |
| **yes** | **occasionally** | **Rarely** | **yes** | **occasionally** | **Rarely** |
| 1 |  |  |  |  |  |  |  |  |  |  |  |  |  |
| 2 |  |  |  |  |  |  |  |  |  |  |  |  |  |
| 3 |  |  |  |  |  |  |  |  |  |  |  |  |  |
| 4 |  |  |  |  |  |  |  |  |  |  |  |  |  |
| 5 |  |  |  |  |  |  |  |  |  |  |  |  |  |

Dear Respected Clinicians: - This is just to request your professional experience in rating the different type of cases treated in your specific department. I am very grateful for your cooperation.

Please would you rate the medications used for the treatment of each of the above cases.

Supplementary Table 3. Clinicians medications rating data

| S/N | Name, strength, dosage/vol. of medications | Prevents serious diseases (A) | Cure serious diseases (B) | Treat minor, self-limited symptoms and conditions (C) | Has proven efficacy (D) | Has unproven efficacy (E) |
| --- | --- | --- | --- | --- | --- | --- |
| 1 |  |  |  |  |  |  |
| 2 |  |  |  |  |  |  |
| 3 |  |  |  |  |  |  |
| 4 |  |  |  |  |  |  |
| 5 |  |  |  |  |  |  |

NB. Choice for the above parameter/options are given below… so fill each of the box with one of the given choices

1. Yes/No
2. Yes/No
3. Possibly/No
4. Always/Usually/May or May not
5. Never/Rarely/May or May not

Supplementary Table 4. Data collection tool for XYZ analysis

| **SN** | **Name of items from annual**  **inventory** | **Unit** | **Unit price** | **Quantity** | **Total price** |
| --- | --- | --- | --- | --- | --- |
|  |  |  |  |  |  |
|  |  |  |  |  |  |
|  |  |  |  |  |  |
|  |  |  |  |  |  |

Supplementary Table 5. Data collection tool for FSN analysis

| **SN** | **List of Items** | **Unit** | **Unit price** | **Total price** | **Frequency of issue** |
| --- | --- | --- | --- | --- | --- |
|  |  |  |  |  |  |
|  |  |  |  |  |  |
|  |  |  |  |  |  |
|  |  |  |  |  |  |
